# Supplementary material for: Effects of different manganese sources on nutrient digestibility, fecal bacterial community, and mineral excretion of weaning dairy calves
Source: Frontiers journal article supplement (doi:10.3389/fmicb.2023.1163468), 2023-05-18
Supplement: Image_1.pdf [file Image_1.pdf]

Figure 1 Venn plots of the three groups within the whole period

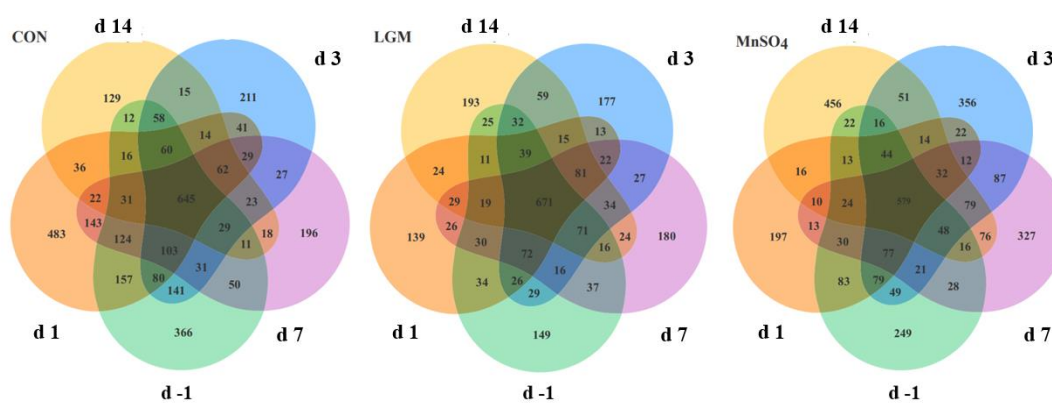

LGM, in the form of chelates (lysine Mn: glutamic acid Mn = 1:1). MnSO<sub>4</sub>, in the form of sulfate Mn. d -1, d 1, d 3, d 7 and d 14 represent calves at -1, 1, 3, 7 and 14 days after weaning, respectively.
