# Supplementary material for: Effects of different manganese sources on nutrient digestibility, fecal bacterial community, and mineral excretion of weaning dairy calves
Source: Frontiers journal article supplement (doi:10.3389/fmicb.2023.1163468), 2023-05-18
Supplement: Table_4.pdf [file Table_4.pdf]

Table 4 Effects of different manganese sources on rectal temperature of calves (°C)

| Item              | Duration of treatment (days) |                    |                    |                    |                     |                     | SEM  | P-value |       |      |
|-------------------|------------------------------|--------------------|--------------------|--------------------|---------------------|---------------------|------|---------|-------|------|
|                   | -14                          | -1                 | 1                  | 3                  | 7                   | 14                  |      | D       | T     | D×T  |
| CON               | 38.54                        | 38.64              | 38.68              | 38.68              | 38.54 <sup>B</sup>  | 38.56 <sup>B</sup>  |      |         |       |      |
| LGM               | 38.68                        | 38.72              | 38.74              | 38.66              | 38.68 <sup>B</sup>  | 38.70 <sup>B</sup>  | 0.20 | 0.07    | <0.01 | 0.01 |
| MnSO <sub>4</sub> | 38.54 <sup>b</sup>           | 38.68 <sup>b</sup> | 38.72 <sup>b</sup> | 38.68 <sup>b</sup> | 38.84 <sup>Ab</sup> | 39.12 <sup>Aa</sup> |      |         |       |      |

Values in the same row (a, b) or in the same column (A, B) with different letters are significantly different ( $P < 0.05$ ).

LGM, in the form of chelates (lysine Mn: glutamic acid Mn = 1:1). MnSO<sub>4</sub>, in the form of sulfate Mn. SEM, standard error of means. D, effect of day. T, effect of group. D × T, interaction between day and group.
